# Supplementary material
Source: PubMed Central journal article supplement (PMC6646161)
Supplement: ao8b01209_si_001.pdf [file ao8b01209_si_001.pdf]

# **Electrochemical Sensing of Biotin using Nafion Modified Boron Doped Diamond Electrode**

Alyah Buzid,<sup>†,‡</sup> Gerard P. McGlacken,<sup>‡</sup> Jeremy D. Glennon,<sup>†,‡</sup> and John H. T. Luong,<sup>\*,†,‡</sup>

<sup>†</sup> Innovative Chromatography Group Irish Separation Science Cluster (ISSC) Ireland.

<sup>‡</sup> School of Chemistry and Analytical & Biological Chemistry Research Facility (ABCRF), University College Cork, Ireland.

\* Corresponding author:

[j.luong@ucc.ie](mailto:j.luong@ucc.ie) (J. H. T. Luong)

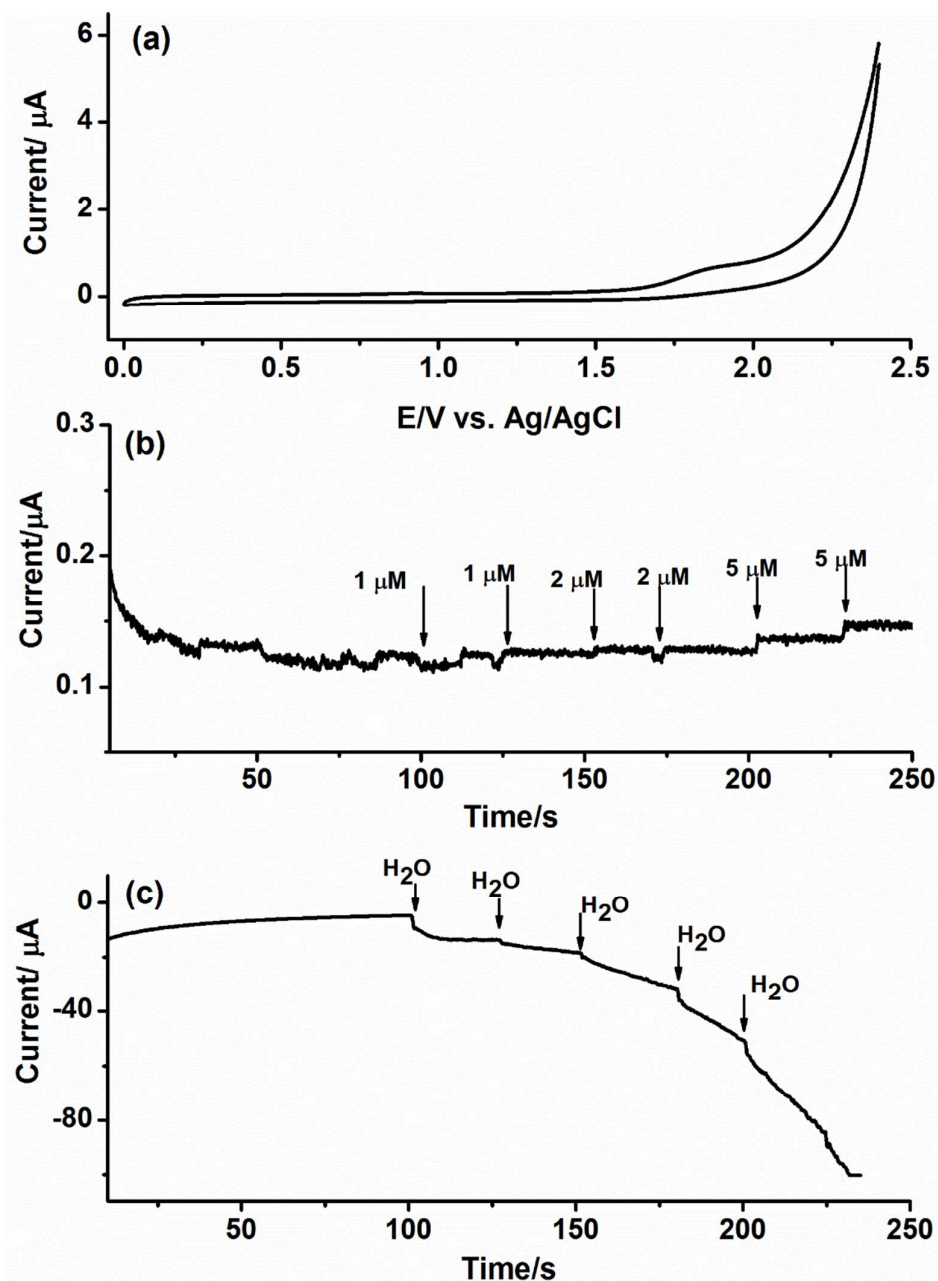

**Figure S1.** (a) CV of 50  $\mu\text{M}$  biotin, a scan rate of  $50 \text{ mVs}^{-1}$ . (b) LOD of biotin using the *i-t* curve at +1.8 V. (c) Water also induced the signal response, indicating its reduction at -1 V. Electrolyte: 0.2 M TBAPF in MeCN. The detection was achieved on the bare BDD electrode vs. Ag/AgCl.

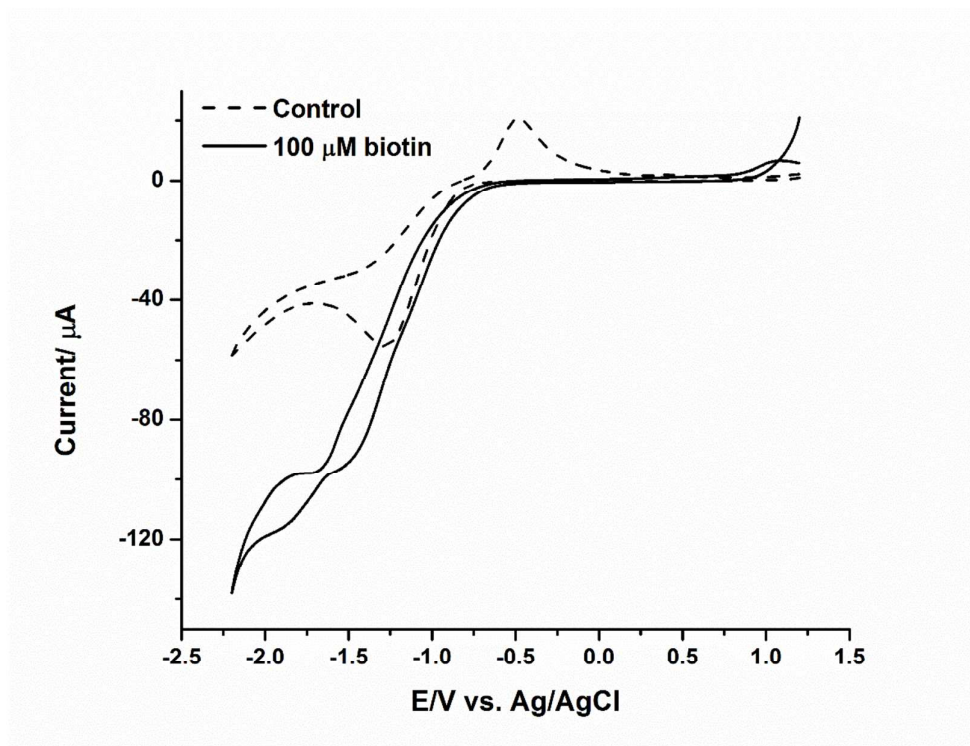

**Figure S2.** The CV of 100  $\mu\text{M}$  biotin obtained by the bare BDD electrode in Electrolyte: 0.2 M TBAPF in MeCN, at a scan rate of  $100 \text{ mVs}^{-1}$ .

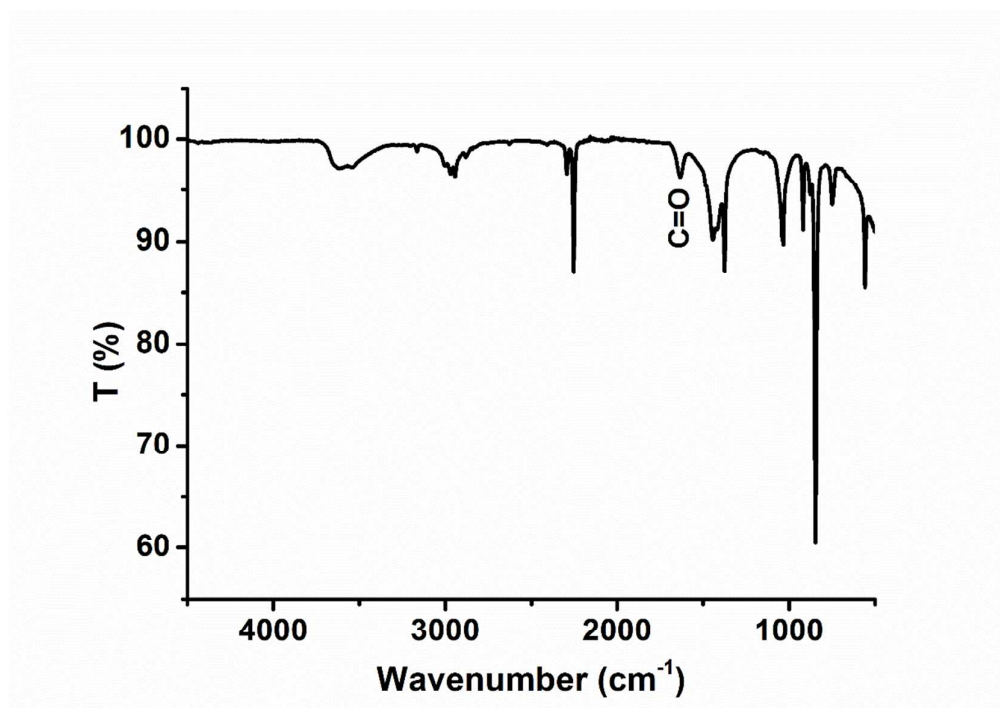

**Figure S3.** IR spectra of 0.2 M TBAPF in MeCN contains 1 % water after 30 cycles of voltammetry ( $-2.5$  to  $+2.5 \text{ V}$  at  $100 \text{ mVs}^{-1}$ ).

**Table S1.** Parameters obtained for the bare and Nafion modified BDD electrodes using an equivalent circuit  $R_s(C_{dl}(R_{ct}Z_w))$ . The parameters were obtained by ZnSimpWin.

|                                           | Bare BDD              | Nafion BDD            |
|-------------------------------------------|-----------------------|-----------------------|
| $R_s$ ( $\Omega$ ) -solution              | 71.3                  | 75.4                  |
| $C_{dl}$ (F) – double layer               | $1.26 \times 10^{-7}$ | $2.24 \times 10^{-7}$ |
| $R_{ct}$ ( $\Omega$ )- charge transfer    | 36.4                  | 43.2                  |
| $Z_w$ ( $\Omega s^{-1/2}$ )-Warburg model | 0.001851              | 0.001372              |
| Chi Square                                | 0.0014                | 0.0036                |

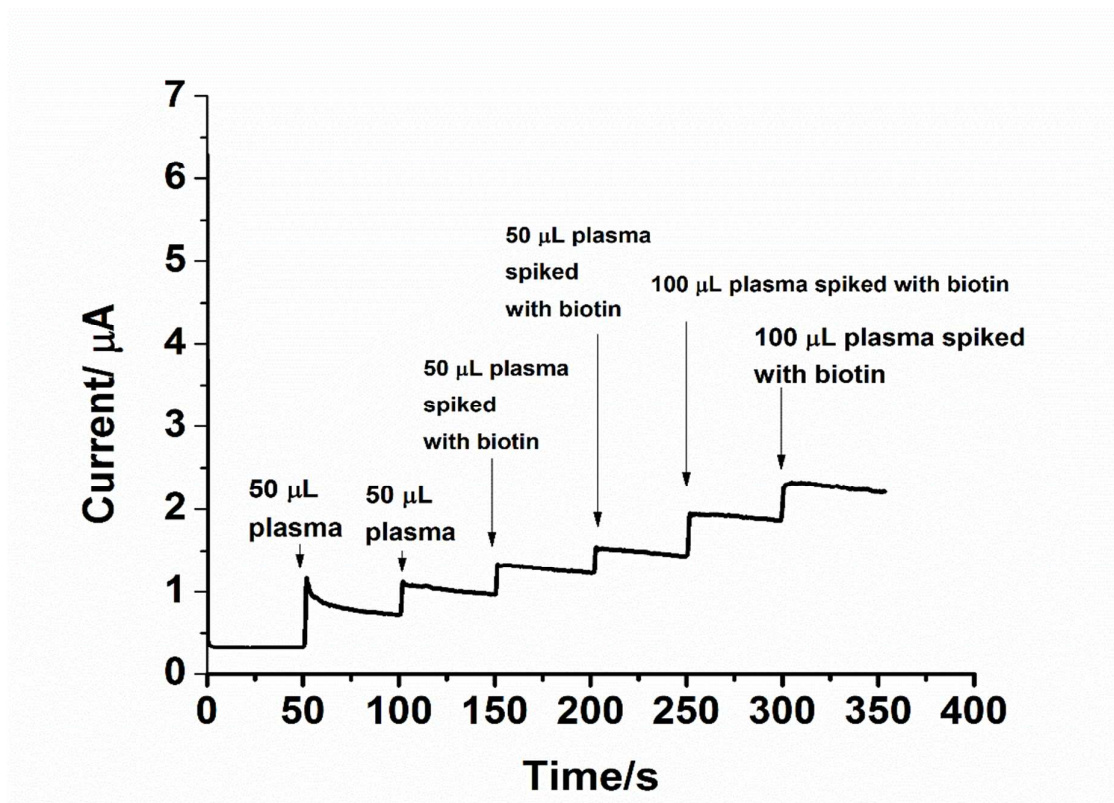

**Figure S4.** The *i-t* curve of the blood plasma and the biotin spiked blood plasma.

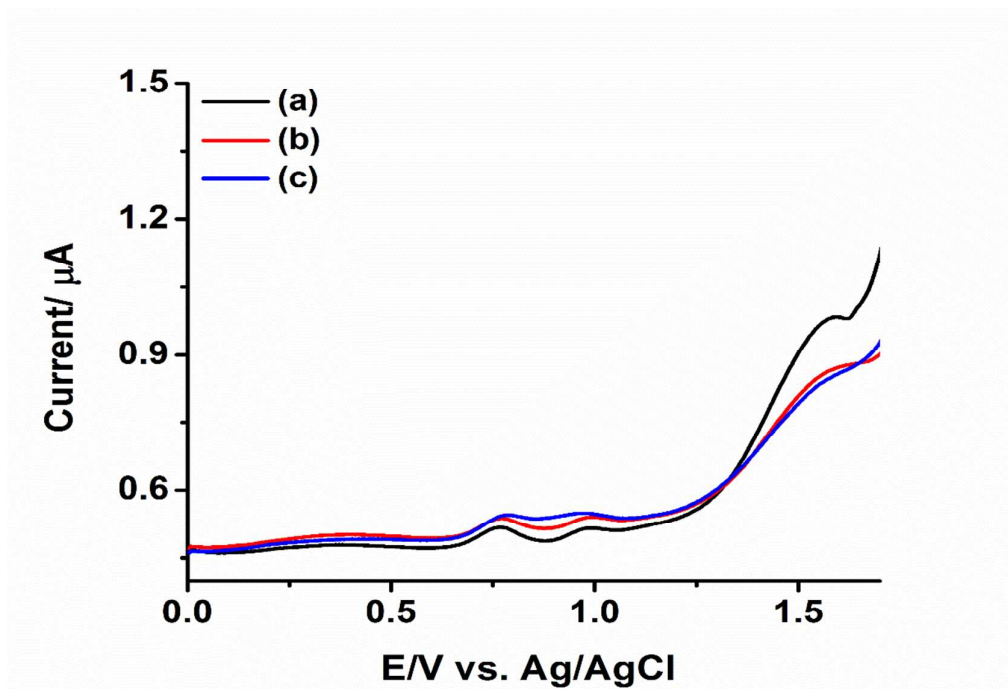

**Figure S5.** DPVs obtained of a blank and spiked plasma sample with a uric acid standard. (a) 200  $\mu\text{L}$  blank plasma; (b) 200  $\mu\text{L}$  uric acid spiked plasma and (c) 400  $\mu\text{L}$  uric acid spiked plasma.

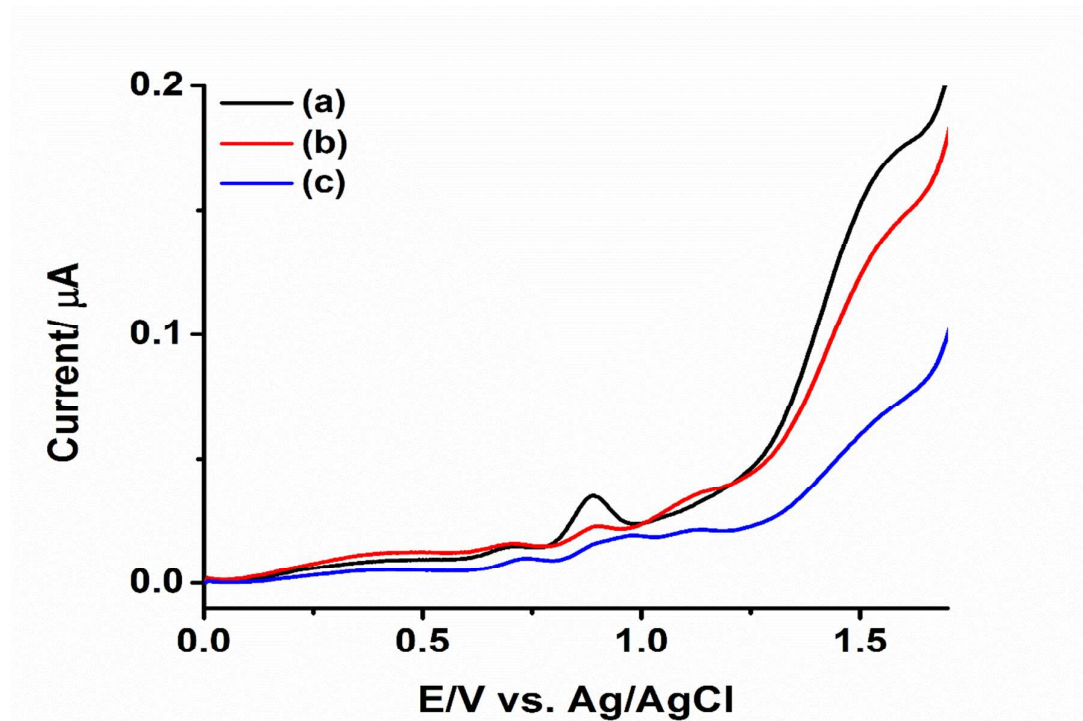

**Figure S6.** DPVs obtained of a blank and spiked plasma sample with a tyrosine standard. (a) 200  $\mu\text{L}$  blank plasma; (b) 200  $\mu\text{L}$  tyrosine spiked plasma and (c) 400  $\mu\text{L}$  tyrosine spiked plasma.
